# Supplementary material for: Distinct and Diverse: Range-Wide Phylogeography Reveals Ancient Lineages and High Genetic Variation in the Endangered Okapi (Okapia johnstoni)
Source: PLoS One. 2014 Jul 9;9(7):e101081. doi: 10.1371/journal.pone.0101081 (PMC4090074; doi:10.1371/journal.pone.0101081)
Supplement: File S10 — Prior (black) and posterior (blue) distribution for PopABC [41] analysis of region one versus region two ( Fig. 1 ). Parameters investigated are mutation rate (mut rate [A]), migration into sampling regions one and two (labelled mig1 [B] and mig2 [C] respectively), effective population size of sampling regions one and two (labelled Ne1 [D] and Ne2 [E] respectively), effective population size of the ancestral population (NeA [F]) and time since divergence of sampling regions one and two (labelled t1 [G]). (DOCX) [file pone.0101081.s016.docx]

**File S10 [A-G].** Prior (black) andposterior (blue) distribution for PopABC [[1](#_ENREF_1)] analysis of region one versus region two (Fig. 1). Parameters investigated are mutation rate (mut rate [A]), migration into sampling regions one and two (labelled mig1 [B] and mig2 [C] respectively), effective population size of sampling regions one and two (labelled Ne1 [D] and Ne2 [E] respectively), effective population size of the ancestral population (NeA [F]) and time since divergence of sampling regions one and two (labelled t1 [G]).

G

F

E

D

C

B

A

References

1. Lopes JS, Balding D, Beaumont M (2009) PopABC: a program to infer historical demographic parameters. Bioinformatics 25: 2747-2749.
